# Supplementary material
Source: PubMed Central journal article supplement (PMC3739057)
Supplement: NIHMS470885-supplement-Supporting_Information.pdf [file NIHMS470885-supplement-Supporting_Information.pdf]

**Chemistry as an Expanding Resource in Protein Science: Fully Synthetic and Fully Active Human Parathyroid Hormone-Related Protein (1-141)\*\***

**Jianfeng Li,<sup>†</sup> Suwei Dong,<sup>†</sup> Steven D. Townsend,<sup>†</sup> Thomas Dean,<sup>§</sup> Thomas J. Gardella,<sup>§</sup> and Samuel J. Danishefsky<sup>†,‡,\*</sup>**

<sup>†</sup>Laboratory for Bioorganic Chemistry, Sloan-Kettering Institute for Cancer Research, 1275 York Avenue, New York, NY 10065 <sup>‡</sup>Department of Chemistry, Columbia University, Havemeyer Hall, 3000 Broadway, New York, NY 10027, (USA) <sup>§</sup> Address, Endocrine Unit, Massachusetts General Hospital and Harvard Medical School, 51 Blossom St. Boston, MA (USA)

|| To whom reprint requests should be addressed.

E-mail: [s-danishefsky@ski.mskcc.org](mailto:s-danishefsky@ski.mskcc.org)

## Materials and Methods

All commercial materials (Aldrich, Fluka, Nova) were used without further purification. All solvents were reagent grade or HPLC grade (Fisher). Anhydrous THF, diethyl ether, CH<sub>2</sub>Cl<sub>2</sub>, toluene, and benzene were obtained from a dry solvent system (passed through column of alumina) and used without further drying. All reactions were performed under an atmosphere of pre-purified dry Ar(g). NMR spectra (<sup>1</sup>H and <sup>13</sup>C) were recorded on a Bruker Advance II 600 MHz or Bruker Advance DRX-500 MHz, referenced to TMS or residual solvent. Low-resolution mass spectral analyses were performed with a JOEL JMS-DX-303-HF mass spectrometer or Waters Micromass ZQ mass spectrometer. Analytical TLC was performed on E. Merck silica gel 60 F254 plates and flash column chromatography was performed on E. Merck silica gel 60 (40–63 mm). Yields refer to chromatographically pure compounds.

HPLC: All separations involved a mobile phase of 0.05% TFA (v/v) in water (solvent A)/0.04% TFA in acetonitrile (solvent B). LCMS analyses were performed using a Waters 2695 Separations Module and a Waters 996 Photodiode Array Detector equipped with Varian Microsorb 100-5, C18 150x2.0mm and Varian Microsorb 300-5, C4 250x2.0mm columns at a flow rate of 0.2 mL/min. UPLC-MS analyses were performed using a Waters Acquity<sup>TM</sup> Ultra Performance LC system equipped with Acquity UPLC<sup>®</sup> BEH C18, 1.7 μl, 2.1 x 100 mm, Acquity UPLC<sup>®</sup> BEH C8, 1.7 μl, 2.1 x 100 mm, Acquity UPLC<sup>®</sup> BEH 300 C4, 1.7 μl, 2.1 x 100 mm columns at a flow rate of 0.3 mL/min. Preparative separations were performed using a Rainin HPLC solvent delivery system equipped with a Rainin UV-1 detector and Varian Dynamax using Varian Microsorb 100-5, C18 250x21.4mm and Varian Microsorb 300-5, C4 250x21.4mm columns at a flow rate of 16.0 mL/min.

## Solid Phase Peptide Synthesis

Automated peptide synthesis was performed on an Applied Biosystems Pioneer continuous flow peptide synthesizer. Peptides were synthesized under standard automated Fmoc protocols. The deblock mixture was a mixture of 100/5/5 of DMF/piperidine/DBU. The following Fmoc amino acids from NovaBiochem were employed: Fmoc-Ala-OH, Fmoc-Arg(Pbf)-OH, Fmoc-Asn(Trt)-OH, Fmoc-Asp(OtBu)-OH, Fmoc-Glu(OtBu)-OH, Fmoc-Gln(Trt)-OH, Fmoc-Gly-OH, Fmoc-His(Trt)-OH, Fmoc-Ile-OH, Fmoc-Leu-OH, Fmoc-Lys(Boc)-OH, Fmoc-Phe-OH, Fmoc-Pro-OH, Fmoc-Ser(tBu)-OH, Fmoc-Thr(tBu)-OH, Fmoc-Val-OH, Fmoc-Trp(Boc)-OH, Fmoc-Tyr(tBu)-OH. Pseudoproline dipeptides were employed at position of Val<sup>2</sup>-Ser<sup>3</sup>, Lys<sup>13</sup>-Ser<sup>14</sup>, Asp<sup>113</sup>-Ser<sup>114</sup>, Asp<sup>128</sup>-Thr<sup>129</sup>, Asp<sup>137</sup>-Ser<sup>138</sup>.<sup>1</sup> Aspartimide preventing reagent Fmoc-Asp(Die)-OH was prepared by following literature procedure<sup>2</sup> and used at positions of Asp<sup>10</sup>, Asp<sup>17</sup>, Asp<sup>62</sup>, Asp<sup>63</sup>.

## Synthesis of 2

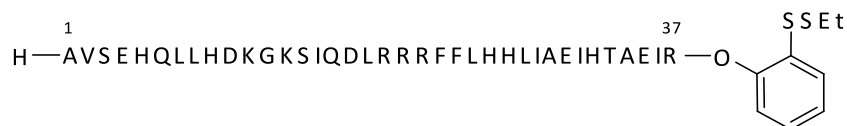

## 2

The fully protected peptide **6** (510.00 mg, 67.6  $\mu\text{mol}$ , 1.0 eq) was mixed with (2S)-1-(2-(ethylsulfinothioyl)phenoxy)-1-oxo-5-(3-((2,2,4,6,7-pentamethyl-2,3-dihydrobenzofuran-5-yl)sulfonyl)-guanidino)pentan-2-ammonium chloride (85.37 mg, 2.0 eq) and HOObt (22.06 mg, 2.0 eq) in the solvent (1.5 ml,  $\text{CHCl}_3/\text{TfE}$ = 3:1 v/v) and then cooled down to  $-10^\circ\text{C}$ . To the mixture was added slowly EDC (23.9  $\mu\text{l}$ , 2.0 eq). The mixture was subsequently allowed to warm to  $23^\circ\text{C}$  and stirred for 3 h, monitored with UPLC. The resulting mixture was treated with 5% HOAc (2.0 ml) in water and the organic layer was separated. The organic layer then was injected in a cocktail B solution (TFA/PhOH/*i*Pr<sub>3</sub>SiH/H<sub>2</sub>O 88:2:6:4 v/v, 30.0 ml) and stirred for 1.5 h. After that, the solution was then concentrated under N<sub>2</sub> stream and the crude product was precipitated by pouring in cold diethyl ether (30.0 ml). The suspension was centrifuged and the upper ether layer was decanted. The precipitated was purged with diethyl ether (2 x 30.0 ml) and the precipitated was dissolved in aq. MeCN (20.0 ml) and lyophilized. The resulting crude product was further purified with preparative RP-HPLC (linear gradient 31-41% solvent B over 30 min, Microsorb 100-8 C4 column, 16 ml/min, 230 nm, product eluted at about 21.45 min) to afford 33.12 mg of peptide **2** (11% yield).

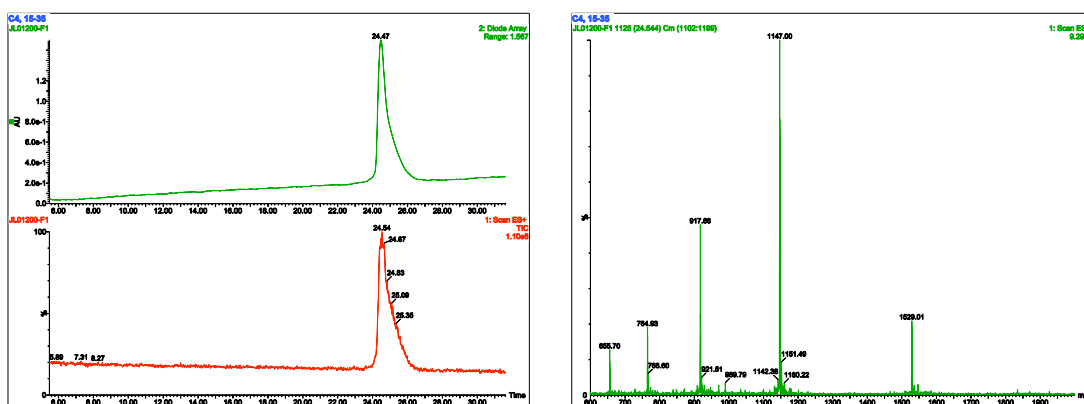

**Peptide 2:** Calcd for  $\text{C}_{205}\text{H}_{325}\text{N}_{63}\text{O}_{53}\text{S}_2$ : 4581.41 Da (average isotopes),  $[\text{M}+3\text{H}]^{3+}$   $m/z$  = 1528.14,  $[\text{M}+4\text{H}]^{4+}$   $m/z$  = 1146.35,  $[\text{M}+5\text{H}]^{5+}$   $m/z$  = 917.28,  $[\text{M}+6\text{H}]^{6+}$   $m/z$  = 764.57,  $[\text{M}+7\text{H}]^{7+}$   $m/z$  = 655.49.

### Synthesis of **3**

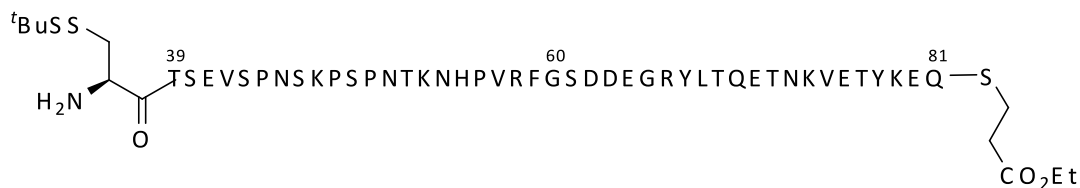

### **3**

The crude fully protected peptide **8** (61.35 mg, 15.3  $\mu$ mmol, 1.0 eq) from the Fmoc SPPS was mixed with H<sub>2</sub>N-Gln(Trt)-S(CH<sub>2</sub>)<sub>2</sub>COOEt•HCl (12.4 mg, 1.5 eq), and HOObt (3.74 mg, 1.5 eq) in a mixed solvent of TFE (150  $\mu$ l) and CHCl<sub>3</sub> (450  $\mu$ l) at -10 °C. To this mixture was added EDC (4.1  $\mu$ l, 1.5 eq). The mixture was then allowed to warm up to 23 °C and stirred for 3 h. The reaction was monitored with UPLC and quenched with CHCl<sub>3</sub> (5.0 ml) and 5% HOAc/H<sub>2</sub>O(5.0 ml). The organic layer was separated, dried (Na<sub>2</sub>SO<sub>4</sub>) and concentrated under reduced pressure.

The residue was dissolved in DMF (1.0 ml) and treated with piperidine (20% in DMF, 5.0 ml). The mixture was stirred for 7 min. and was then quenched with CHCl<sub>3</sub> (10 ml) and sat. NaHCO<sub>3</sub> solution (10 ml). The organic layer was separated, dried (Na<sub>2</sub>SO<sub>4</sub>) and concentrated under reduced pressure.

The resulting residue was then combined with crude fully protected peptide **10**(68.53 mg, 1.0 eq, prepared from SPPS) and HOObt (12.46 mg, 5.0 eq). The mixture was dissolved in CHCl<sub>3</sub> (300  $\mu$ l). To this mixture was added EDC (13.5  $\mu$ l, 5.0 eq) at -10 °C. The mixture was then allowed to warm up to 23 °C and stirred for 2.5 h. The reaction was monitored with UPLC and quenched with CHCl<sub>3</sub> (2.0 ml) and 5% HOAc/H<sub>2</sub>O (2.0 ml). The organic layer was separated, dried (Na<sub>2</sub>SO<sub>4</sub>) and concentrated under reduced pressure. The residue was dissolved in cocktail B (20 ml) and stirred for 1.5 h. The resulting solution was concentrated with N<sub>2</sub> stream. The residue was triturate with cold Et<sub>2</sub>O (2 X 20 ml) and purified with preparative RP-HPLC (linear gradient 12-25% solvent B over 30 min, Microsorb 100-8 C4 column, 16 ml/min, 230 nm, product eluted at about 19.55 min). 40.8 mg pure product **3** was obtained, overall yield 51%.

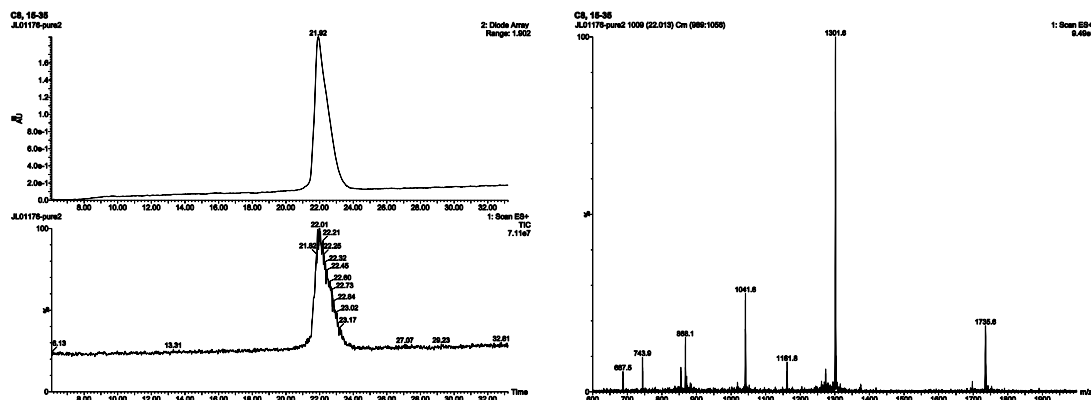

**Peptide 3:** Calcd for  $C_{220}H_{346}N_{62}O_{78}S_3$  : 5200.42 Da (average isotopes),  $[M+3H]^{3+}$   $m/z = 1734.47$ ,  $[M+4H]^{4+}$   $m/z = 1301.11$ ,  $[M+5H]^{5+}$   $m/z = 1041.08$ ,  $[M+6H]^{6+}$   $m/z = 867.74$ ,  $[M+7H]^{7+}$   $m/z = 743.92$ ,  $[M+8H]^{8+}$   $m/z = 651.05$ .

### Synthesis of 4

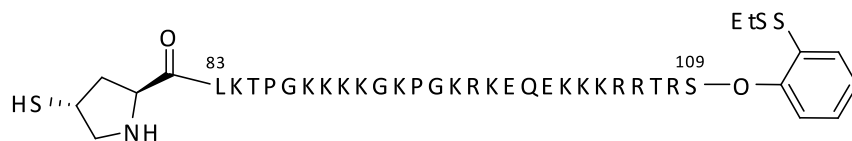

4

The crude fully protected peptide **7** (91.30 mg, 14.80  $\mu$ mmol, 1.0 eq) from the Fmoc SPPS was mixed with  $H_2N$ -Ser(tBu)-O-(2-SSEt)Ph $\cdot$ HCl (8.12 mg, 1.5 eq), and HOObt (3.62 mg, 1.5 eq) in a mixed solvent of TFE (185  $\mu$ l) and  $CHCl_3$  (555  $\mu$ l) at  $-10$   $^{\circ}C$ . To this mixture was added EDC (3.9  $\mu$ l, 1.5 eq). The mixture was then allowed to warm up to  $23$   $^{\circ}C$  and stirred for 3 h. The reaction was monitored with UPLC and quenched with  $CHCl_3$  (5.0 ml) and 5% HOAc/ $H_2O$ (5.0 ml). The organic layer was separated, dried ( $Na_2SO_4$ ) and concentrated under reduced pressure. The residue was then dissolved in cocktail B (3.0 ml) and stirred for 40 min and then the solution was concentrated by  $N_2$  stream. The residue was then triturated with  $Et_2O$  (2x 5 ml) and then purified with preparative RP-HPLC (linear gradient 10-30% solvent B over 30 min, Microsorb 100-8 C8 column, 16 ml/min, 230 nm, product eluted at about 16.24 min). 11.80 mg pure product **4** was obtained in 23% yield.

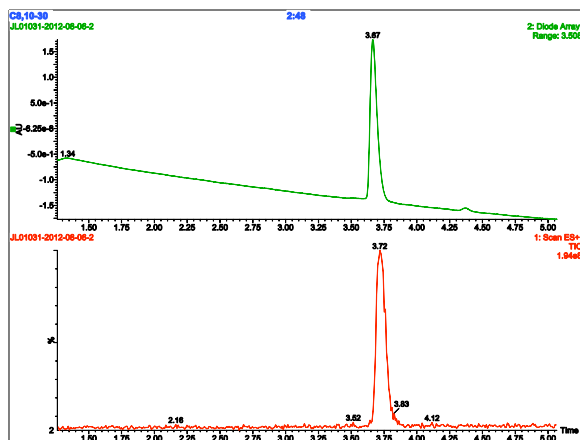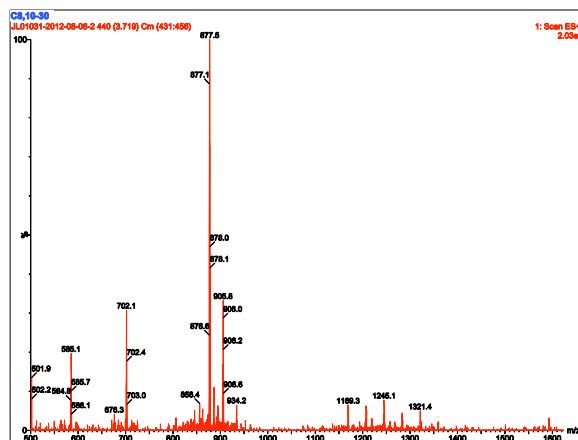

**Peptide 4**, Calcd for  $C_{151}H_{272}N_{52}O_{37}S_3$  : 3502.02 Da (average isotopes),  $[M+3H]^{3+}$   $m/z = 1168.34$ ,  $[M+4H]^{4+}$   $m/z = 876.51$ ,  $[M+5H]^{5+}$   $m/z = 701.40$ ,  $[M+6H]^{6+}$   $m/z = 584.67$ .

### Synthesis of 5

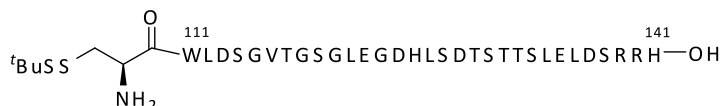

### 5

The synthesis of **5** was directly accomplished via Fmoc-SPPS (0.05 mmol scale). The crude product was purified with preparative RP-HPLC (linear gradient 20-40% solvent B over 30 min, Microsorb 100-8 C4 column, 16 ml/min, 230 nm, product eluted at ~ 20.33 min). 62.1 mg product was obtained (34% yield).

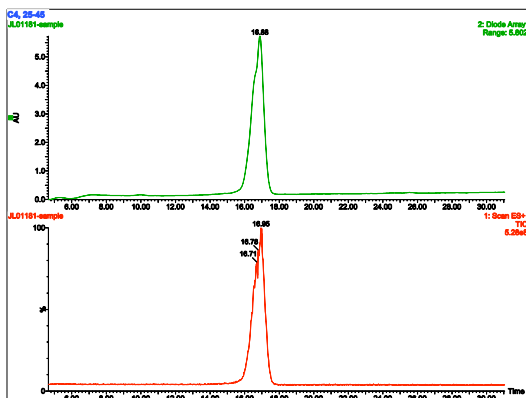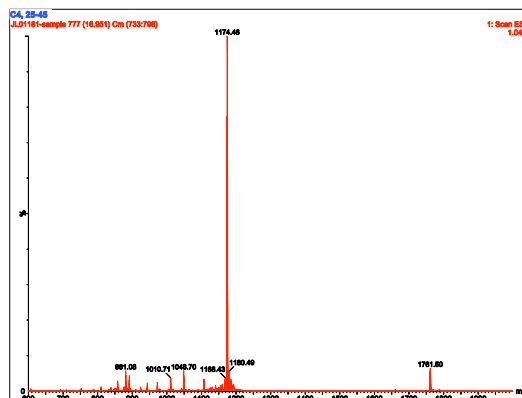

**Peptide 5**. Calcd for  $C_{145}H_{231}N_{43}O_{55}S_2$  : 3518.60 Da ( average isotopes),  $[M+2H]^{2+}$   $m/z = 1760.30$ ,  $[M+3H]^{3+}$   $m/z = 1173.87$ ,  $[M+4H]^{4+}$   $m/z = 880.65$ .

## Synthesis of 11

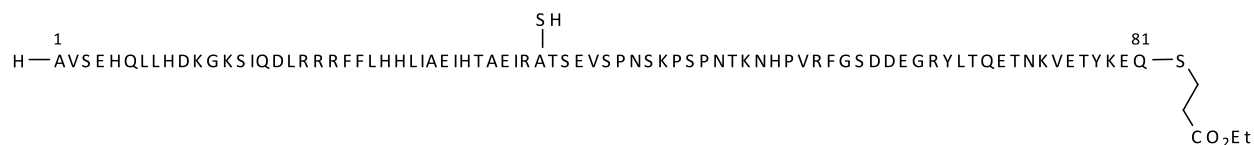

### 11

Peptide **2** (3.02 mg, 0.66  $\mu$ mol) and peptide **3** (4.29 mg, 1.25 eq) were dissolved in aq MeCN and lyophilized. To the resulting starting materials was added ligation buffer (329  $\mu$ l, 6 M GdnHCl, 100 mM Na<sub>2</sub>HPO<sub>4</sub>, 50 mM TCEP, pH 7.2). The mixture was stirred under argon at 23 °C for 2 h, monitored with UPLC and then purified with preparative RP-HPLC (linear gradient 19-37% solvent B over 30 min, Microsorb 100-8 C4 column, 16 ml/min, 230 nm, product eluted at about 16.85 min) to afford 2.50 mg peptide **11** (40% yield).

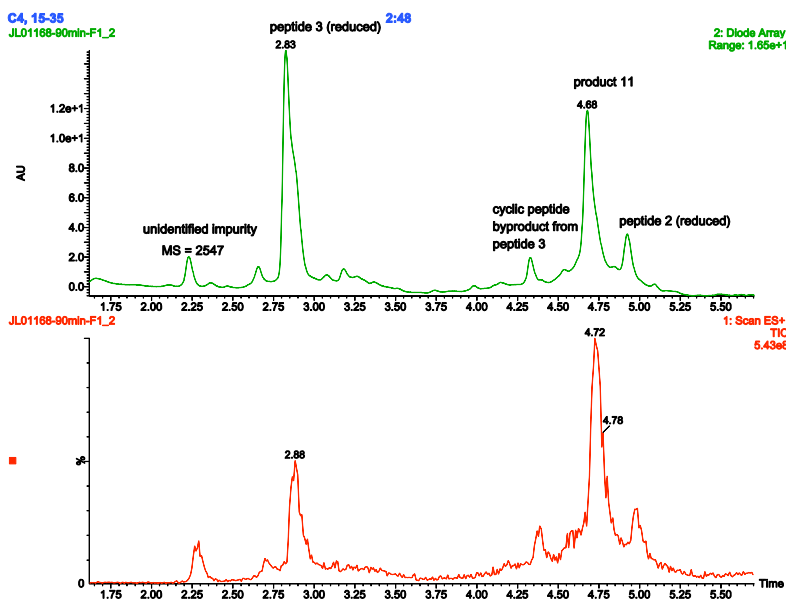

UPLC monitoring spectrum of the NCL reaction between peptide **2** and **3**.

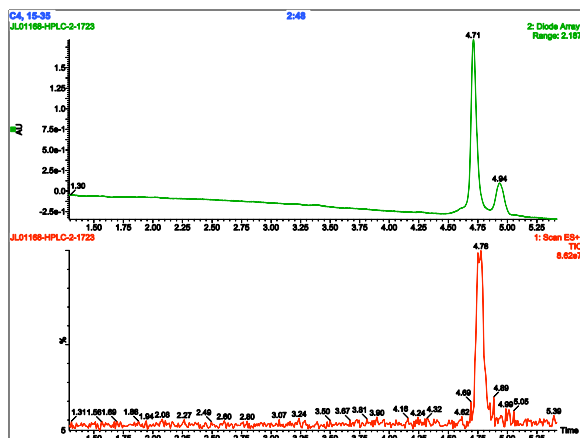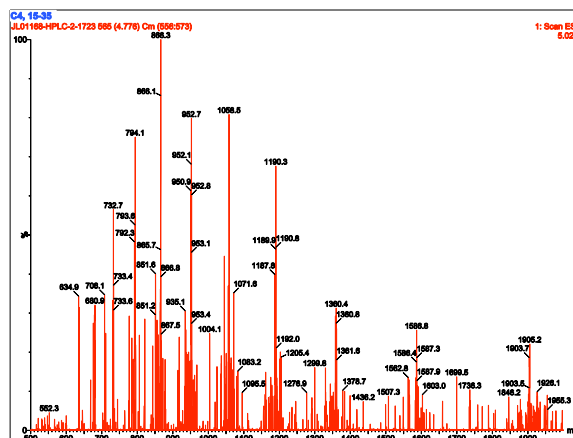

**Peptide 11.** Calcd for  $C_{413}H_{653}N_{125}O_{130}S_2$ , Expected Mass 9507.78,  $[M+6H]^{6+}$   $m/z = 1585.63$ ,  $[M+7H]^{7+}$   $m/z = 1359.25$ ,  $[M+8H]^{8+}$   $m/z = 1189.47$ ,  $[M+9H]^{9+}$   $m/z = 1057.42$ ,  $[M+10H]^{10+}$   $m/z = 951.78$ ,  $[M+11H]^{11+}$   $m/z = 865.34$ ,  $[M+12H]^{12+}$   $m/z = 793.32$ ,  $[M+13H]^{13+}$   $m/z = 732.37$ ,  $[M+14H]^{14+}$   $m/z = 680.13$ .

### Synthesis of 12

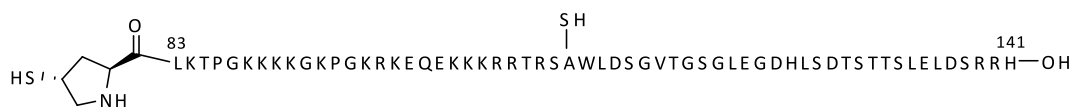

### 12

Peptide **4** (1.80 mg, 0.51  $\mu$ mol) and peptide **5** (2.64 mg, 1.50 eq) were dissolved in aq MeCN and lyophilized. To the resulting starting materials was added ligation buffer (400  $\mu$ l, 6 M GdnHCl, 100 mM  $Na_2HPO_4$ , 50 mM TCEP, pH 7.2). The mixture was stirred under argon at 23  $^{\circ}C$  for 3 h, monitored with UPLC and then purified with preparative RP-HPLC (linear gradient 24-44% solvent B over 30 min, Microsorb 100-8 C4 column, 16 ml/min, 230 nm, product eluted at about 23.37 min). to afford 1.67 mg peptide **12** (49% yield).





## Synthesis of 13

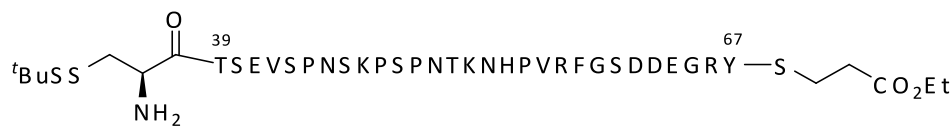

### 13

The fully protected peptide **15** (147.0 mg, 25.6  $\mu\text{mol}$ , 1.0 eq) was mixed with (S)-ethyl 3-((2-amino-3-(4-(tert-butoxy)phenyl)propanoyl)thio)propanoate (18.12 mg, 2.0 eq) and HOObt (7.96 mg, 2.0 eq) in the solvent (0.25 ml,  $\text{CHCl}_3/\text{TFE}$ = 3:1 v/v) and then cooled down to  $-10\text{ }^\circ\text{C}$ . To the mixture was added slowly EDC (9.1  $\mu\text{l}$ , 2.0 eq). The mixture was subsequently allowed to warm to  $23\text{ }^\circ\text{C}$  and stirred for 3 h, monitored with UPLC. The resulting mixture was treated with 5% HOAc (0.5 ml) in water and the organic layer was separated. The organic layer then was injected in a cocktail B solution (20.0 ml) and stirred for 1.5 h. After that, the solution was then concentrated under  $\text{N}_2$  stream and the crude product was precipitated by pouring in cold diethyl ether (20.0 ml). The suspension was centrifuged and the upper ether layer was decanted. The precipitated was purged with diethyl ether (2 x 20.0 ml) and the precipitated was dissolved in aq. MeCN (15.0 ml) and lyophilized. The resulting crude product was further purified with preparative RP-HPLC (linear gradient 20-30% solvent B over 30 min, Microsorb 100-8 C8 column, 16 ml/min, 230 nm, product eluted at about 20.01 min) to afford 25.34 mg of peptide **13** (29% yield).

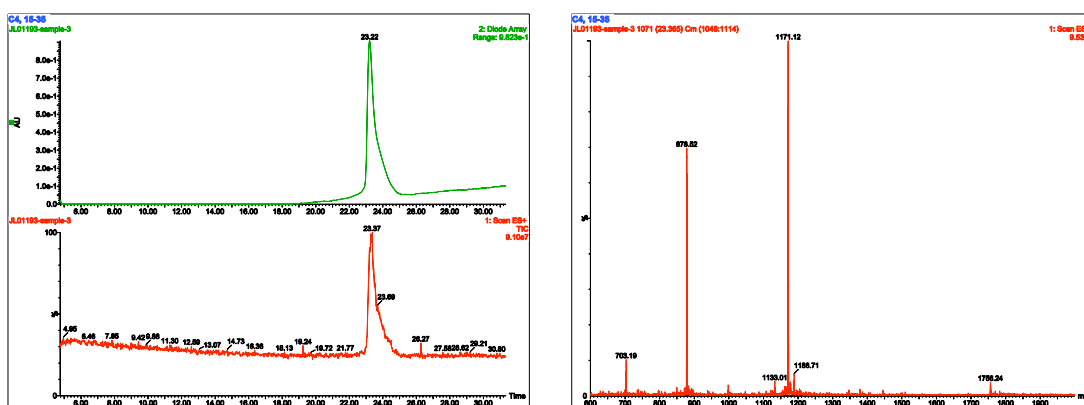

**Peptide 13.** Calcd for  $\text{C}_{147}\text{H}_{229}\text{N}_{43}\text{O}_{51}\text{S}_3$ : 3508.58,  $[\text{M}+2\text{H}]^{2+}$   $m/z = 1755.29$ ,  $[\text{M}+3\text{H}]^{3+}$   $m/z = 1170.53$ ,  $[\text{M}+4\text{H}]^{4+}$   $m/z = 878.15$ ,  $[\text{M}+5\text{H}]^{5+}$   $m/z = 702.72$ .

## Synthesis of **14**

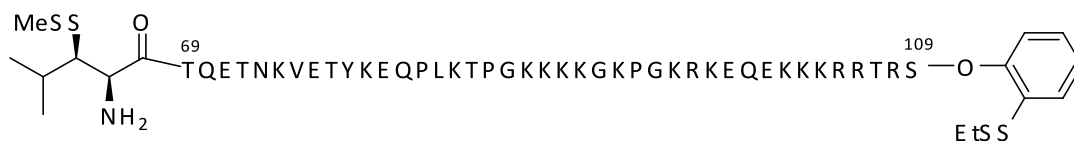

### 14

The peptide resin **16** (0.10 mmol, 1.0 eq) from the Fmoc SPPS was mixed with Boc-Leu(SSMe)-OH (31.91 mg, 1.0 eq), HATU (114.02 mg, 3.0 eq), and DIEA (104  $\mu$ l, 6.0 eq) in DMF (1.0 ml) and stirred at 23 °C for 10 min. The resin was washed with DMF, DCM, and MeOH several times and dried under vacuum. The resin was cleaved by treatment with AcOH/TFE/DCM (1:1:8) for 2 x 1 hour to yield the crude fully protected peptide (266.80 mg) .

The fully protected peptide (266.80 mg, 29.7  $\mu$ mol, 1.0 eq) and (2*S*)-2-(ethylsulfinothioyl)phenyl 2-amino-3-(tert-butoxy)propanoate (19.58 mg, 2.0 eq) was dissolved in solvents (594  $\mu$ l, CHCl<sub>3</sub>/TFE= 3:1 v/v). To this mixture was added HOObt (9.69 mg, 2.0 eq). The mixture was then sonicated and cooled to -10 °C. To the mixture was added slowly EDC (11.0  $\mu$ l, 2.0 eq) with stirring. The mixture was subsequently allowed to warm to 23 °C and stirred for 3 h, monitored with UPLC. The resulting mixture was treated with 5% HOAc in water (1.0 ml) and the organic layer was separated. The organic layer then was injected in a cocktail B solution (30.0 ml) and stirred for 1.5 h. After that, the solution was then concentrated under N<sub>2</sub> stream and the crude product was precipitated by pouring in cold diethyl ether (30.0 ml). The suspension was centrifuged and the upper ether layer was decanted. The precipitated was purged with diethyl ether twice (30.0 ml each) and the precipitated was dissolved in aq. MeCN (1:1 v/v, 20 ml) and lyophilized. The resulting crude product was further purified with preparative RP-HPLC (linear gradient 5-15% solvent B over 30 min, Microsorb 100-8 C4 column, 16 ml/min, 230 nm, product eluted at about 19.15 min) to afford 46.46 mg of peptide **14** (9% overall yield).

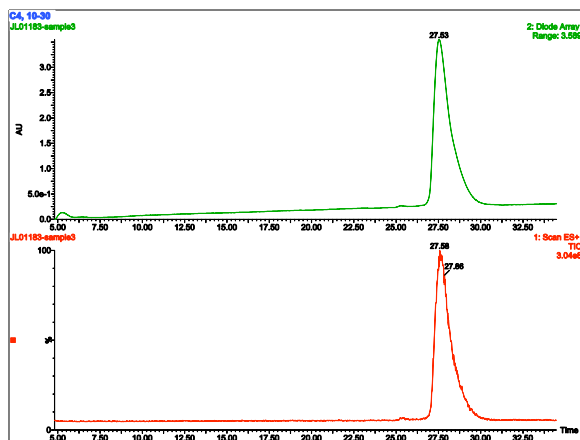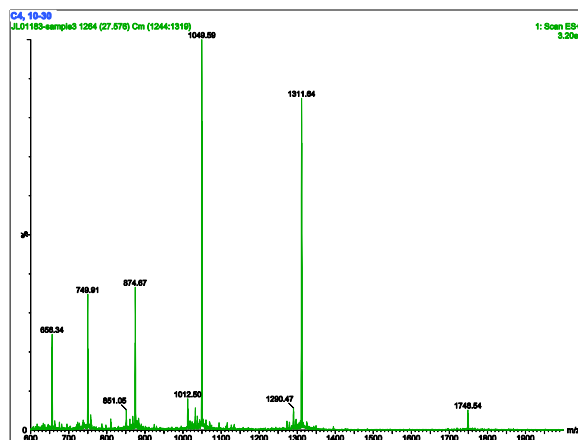

**Peptide 14.** Calcd for  $C_{225}H_{391}N_{71}O_{64}S_4$ : 5239.84,  $[M+3H]^{3+}$   $m/z = 1747.61$ ,  $[M+4H]^{4+}$   $m/z = 1310.96$ ,  $[M+5H]^{5+}$   $m/z = 1048.97$ ,  $[M+6H]^{6+}$   $m/z = 874.31$ ,  $[M+7H]^{7+}$   $m/z = 749.55$ ,  $[M+8H]^{8+}$   $m/z = 655.98$ .

## Synthesis of 17

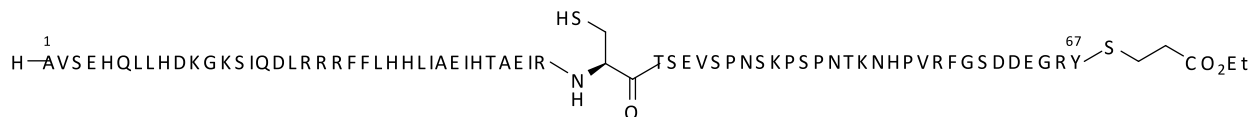

**17**

Peptide **2** (2.5 mg, 0.39  $\mu$ mol, 1.00 eq) and peptide **13** (1.54 mg, 0.44  $\mu$ mol, 1.12 eq) were dissolved in ac MeCN and lyophilized. To the resulting starting materials was added ligation buffer (300  $\mu$ l, 6 M GdnHCl, 100 mM  $Na_2HPO_4$ , 50 mM TCEP, pH 7.2). The mixture was stirred under argon at 23  $^{\circ}C$  for 3 h, monitored with UPLC and then purified with preparative RP-HPLC (linear gradient 24-44% solvent B over 30 min, Microsorb 100-8 C4 column, 16 ml/min, 230 nm, product eluted at about 23.91 min). to afford 1.63 mg peptide **17** (49% yield).

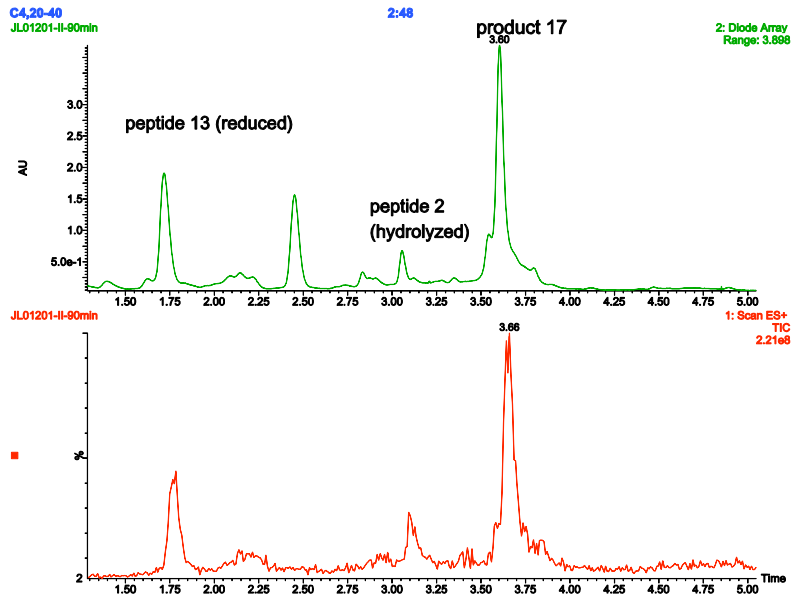

UPLC monitoring spectrum of the NCL reaction between peptide 2 and 13.

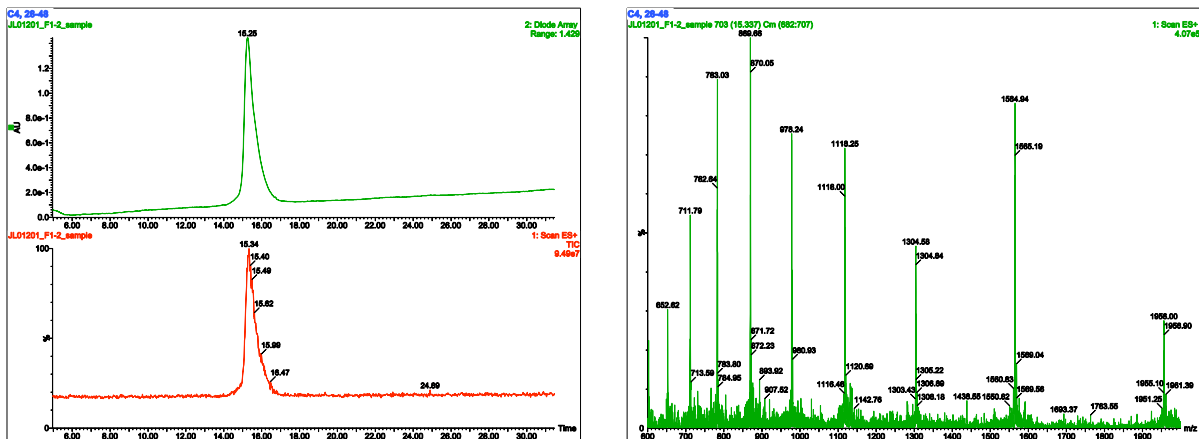

**Peptide 17.** Calcd for  $C_{340}H_{536}N_{106}O_{103}S_2$ , Expected Mass 7815.94,  $[M+4H]^{4+}$   $m/z = 1954.99$ ,  $[M+5H]^{5+}$   $m/z = 1564.19$ ,  $[M+6H]^{6+}$   $m/z = 1303.66$ ,  $[M+7H]^{7+}$   $m/z = 1117.56$ ,  $[M+8H]^{8+}$   $m/z = 977.99$ ,  $[M+9H]^{9+}$   $m/z = 869.44$ ,  $[M+10H]^{10+}$   $m/z = 782.59$ ,  $[M+11H]^{11+}$   $m/z = 711.54$ ,  $[M+12H]^{12+}$   $m/z = 652.33$ .

## Synthesis of 18

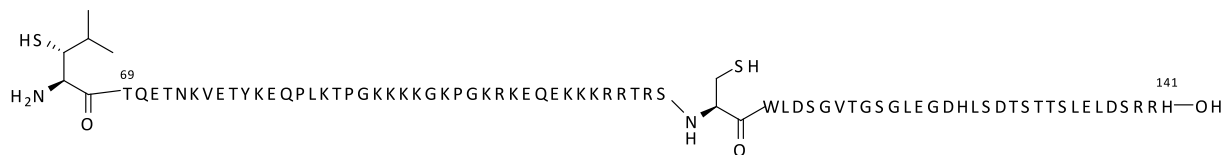

## 18

Peptide **14** (3.53 mg, 0.77  $\mu\text{mol}$ , 1.0 eq) and peptide **5** (2.70 mg, 0.77  $\mu\text{mol}$ , 1.0 eq) were dissolved in ligation buffer (350  $\mu\text{l}$ , 6 M GdnHCl, 100 mM Na<sub>2</sub>HPO<sub>4</sub>, 50 mM TCEP, pH 7.2). The mixture was stirred under argon at 23 °C for 3 h, monitored with UPLC and then purified with preparative RP-HPLC (linear gradient 12-32% solvent B over 30 min, Microsorb 100-8 C4 column, 16 ml/min, 230 nm, product eluted at about 10.28 min) to afford 3.35 mg peptide **18** (56% yield).

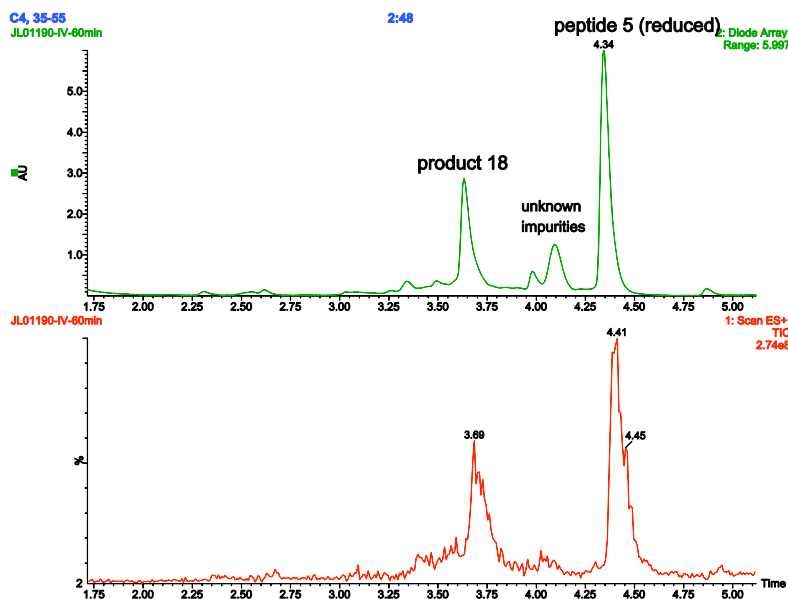

UPLC monitoring spectrum of the NCL reaction between peptide **14** and **5**.



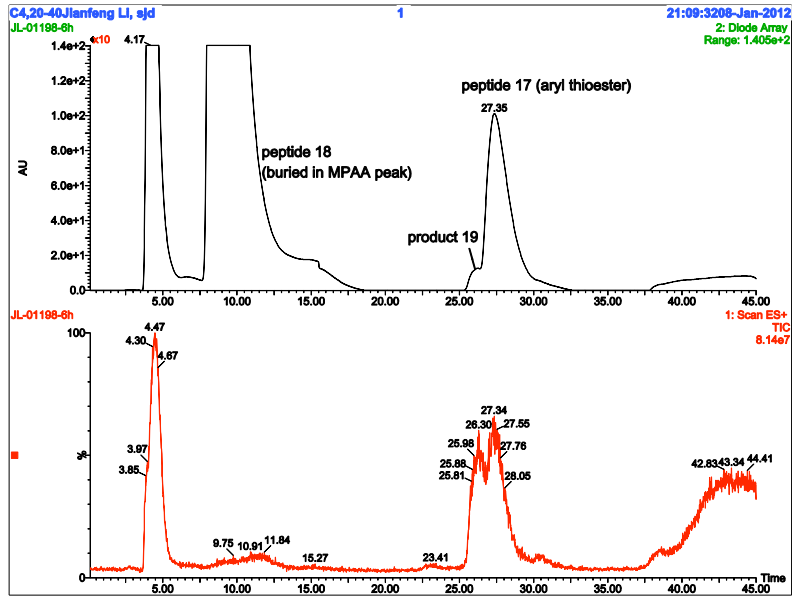

UPLC monitoring spectrum of the NCL reaction between peptide 17 and 18.

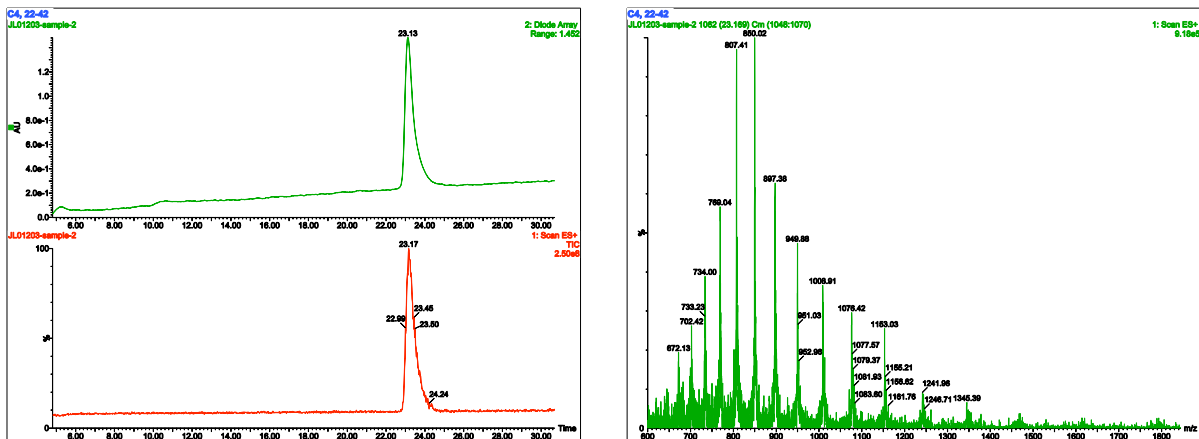

**Peptide 19.** Calcd for  $C_{692}H_{1128}N_{220}O_{219}S_3$ , Expected Mass 16120.31,  $[M+12H]^{12+}$   $m/z = 1344.36$ ,  $[M+13H]^{13+}$   $m/z = 1241.02$ ,  $[M+14H]^{14+}$   $m/z = 1152.45$ ,  $[M+15H]^{15+}$   $m/z = 1075.69$ ,  $[M+16H]^{16+}$   $m/z = 1008.52$ ,  $[M+17H]^{17+}$   $m/z = 949.25$ ,  $[M+18H]^{18+}$   $m/z = 897.13$ ,  $[M+19H]^{19+}$   $m/z = 849.44$ ,  $[M+20H]^{20+}$   $m/z = 807.02$ ,  $[M+21H]^{21+}$   $m/z = 768.63$ ,  $[M+22H]^{22+}$   $m/z = 733.74$ ,  $[M+23H]^{23+}$   $m/z = 701.88$ ,  $[M+24H]^{24+}$   $m/z = 672.68$ .



## Synthesis of 1

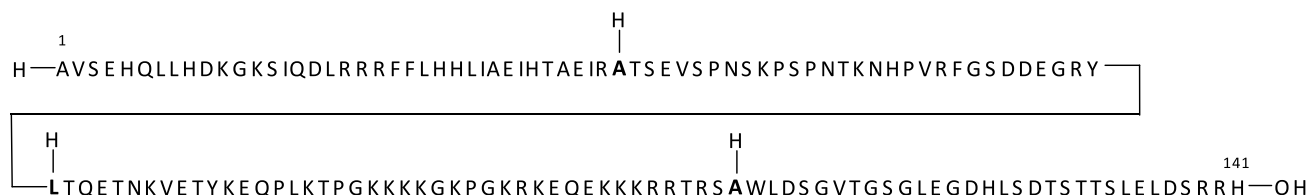

### 1

**Peptide 19** (4.00 mg, 0.25  $\mu\text{mol}$ ) was dissolved in aq MeCN (0.67 ml). To this buffer was added VA-044 (21.8 mg) and Bond Breaker (675  $\mu\text{l}$ , 0.5 M solution of TCEP) and *t*BuSH (67  $\mu\text{l}$ ). The system was stirred under argon atmosphere at 37  $^{\circ}\text{C}$  for 2 h. Additional VA-044 (21.8 mg in 1.0 ml water) and *t*BuSH (67  $\mu\text{l}$ ) were added to the mixture and the mixture was stirred for additional 1 h. The reaction was monitored with LC-MS. The product was directly purified with preparative HP preparative RP-HPLC (linear gradient 20-40% solvent B over 30 min, Microsorb 100-8 C4 column, 16 ml/min, 230 nm, product eluted at about 22.15 min) to afford 2.77 mg **1** (70% yield).

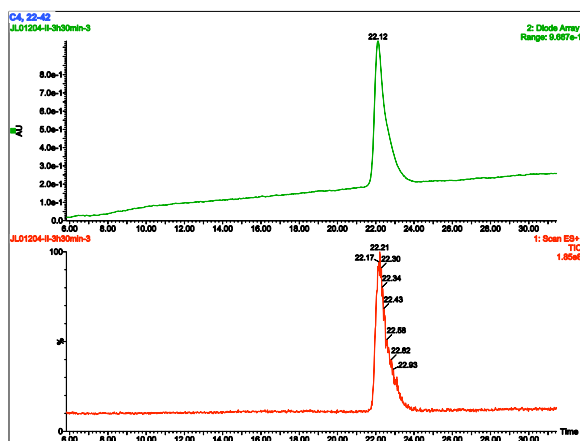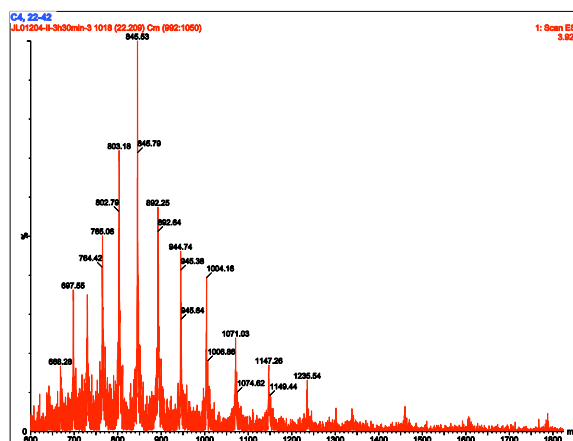

**Peptide 1.** Calcd for  $\text{C}_{692}\text{H}_{1128}\text{N}_{220}\text{O}_{219}$ , Expected Mass 16024.39,  $[\text{M}+13\text{H}]^{13+}$   $m/z = 1233.65$ ,  $[\text{M}+14\text{H}]^{14+}$   $m/z = 1145.60$ ,  $[\text{M}+15\text{H}]^{15+}$   $m/z = 1069.29$ ,  $[\text{M}+16\text{H}]^{16+}$   $m/z = 1002.52$ ,  $[\text{M}+17\text{H}]^{17+}$   $m/z = 943.61$ ,  $[\text{M}+18\text{H}]^{18+}$   $m/z = 891.24$ ,  $[\text{M}+19\text{H}]^{19+}$   $m/z = 844.39$ ,  $[\text{M}+20\text{H}]^{20+}$   $m/z = 802.22$ ,  $[\text{M}+21\text{H}]^{21+}$   $m/z = 764.07$ ,  $[\text{M}+22\text{H}]^{22+}$   $m/z = 729.38$ ,  $[\text{M}+23\text{H}]^{23+}$   $m/z = 697.71$ ,  $[\text{M}+24\text{H}]^{24+}$   $m/z = 668.68$ .

The CD spectrum of hPTHrP(1-141), compared with those of hPTH(1-37) and hPTH(1-84).

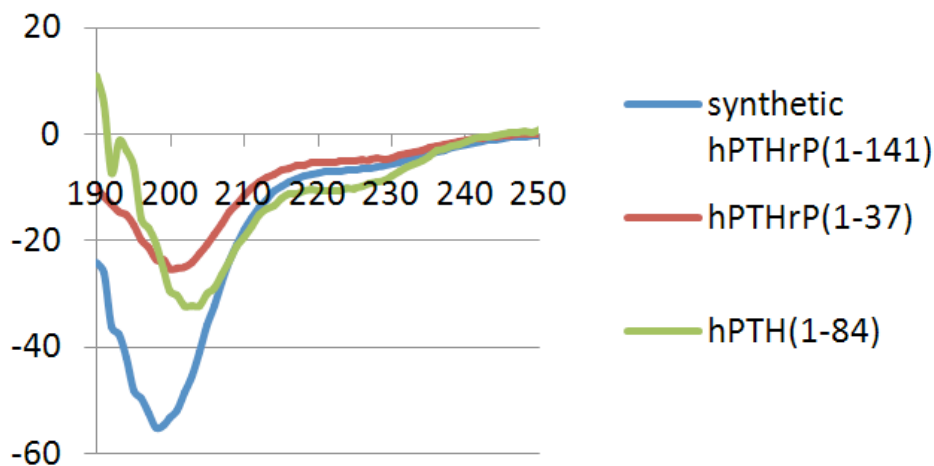

## Synthesis of hPTHrP(1-37)

### Peptidyl thiophenol ester **20**

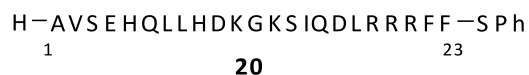

The fully protected peptidyl acid (1-22) was prepared on a 0.05 mol scale by SPPS according to the general procedure using standard Fmoc amino acids, and Fmoc-Asp(ODie)-OH to suppress the aspartimide formation. After cleavage, 201.1 mg crude peptide was obtained (80% yield).

The fully protected peptidyl acid (62.8 mg, 12.4  $\mu\text{mol}$ , 1.0 equiv) and HCl-H-Phe-SPh (10.9 mg, 37.3  $\mu\text{mol}$ , 3.0 equiv) in  $\text{CHCl}_3/\text{TFE}$  (v/v = 3:1, 1.5 mL) was cooled to  $-10^\circ\text{C}$ . HOObt (6.1 mg, 37.3  $\mu\text{mol}$ , 3.0 equiv) and EDCI (6.60  $\mu\text{L}$ , 37.3  $\mu\text{mol}$ , 3.0 equiv) were added. The reaction mixture was stirred at room temperature for 3 h. The solvent was then blown off under a gentle  $\text{N}_2$  stream and 10 mL of TFA/ $\text{H}_2\text{O}$ /TIS (95:2.5:2.5) was added. After deprotection for 45 min, TFA was blown off and the oily residue was triturated with 6 mL of diethyl ether. The precipitate was pelleted and the ether was subsequently decanted. The resulting solid was purified using RP-HPLC (linear gradient 35-55% solvent B over 30 min, Microsorb 100-8 C18 column, 16 mL/min, 230 nm), and the product eluted at 22.5-25 min. The fractions were collected, and concentrated via lyophilization to provide peptide **20** (15.2 mg, 43%) as a white solid.

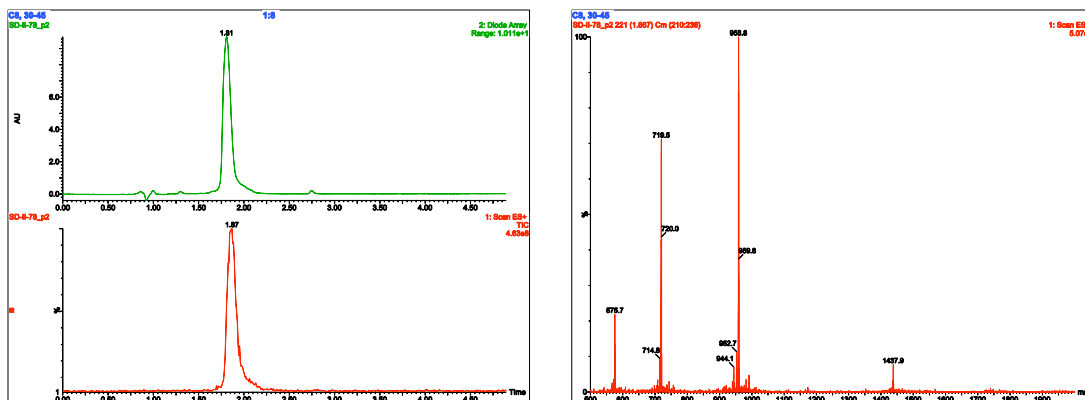

**Peptide 20:** Calcd for  $C_{129}H_{202}N_{40}O_{33}S$ : 2873.30 Da (average isotopes),  $[M+3H]^{3+}$   $m/z = 958.77$ ,  $[M+4H]^{4+}$   $m/z = 719.32$ ,  $[M+5H]^{5+}$   $m/z = 575.66$ ; observed:  $[M+3H]^{3+}$   $m/z = 958.7$ ,  $[M+4H]^{4+}$   $m/z = 719.4$ ,  $[M+5H]^{5+}$   $m/z = 575.8$ .

### Thioleucine-containing Peptide 21

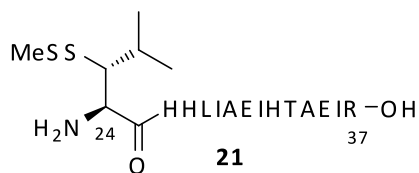

The peptide resin from the Fmoc SPPS (13.01  $\mu\text{mol}$ , 1.0 equiv) was mixed with Boc-Leu(SSMe)-OH (6.03 mg, 19.52  $\mu\text{mol}$ , 1.5 equiv), HATU (24.7 mg, 65.05  $\mu\text{mol}$ , 5.0 equiv) and DIEA (18.13  $\mu\text{L}$ , 104.1  $\mu\text{mol}$ , 8.0 equiv) in DMF (600  $\mu\text{L}$ ) and stirred at room temperature for 10 min. The resin was washed with DMF, DCM and MeOH several times and dried under vacuum. The dried resin was treated with TFA/TIS/ $H_2O$  (95:2.5:2.5) for 40 min, TFA was blown off by  $N_2$  and the oily residue was triturated with diethyl ether. The precipitate was pelleted and the ether was subsequently decanted. The resulting solid was purified using RP-HPLC (linear gradient 18-33% solvent B over 30 min, Microsorb 100-8 C18 column, 16 mL/min, 230 nm), and the product eluted at 18.5-23 min. The fractions were collected, and concentrated via lyophilization to afford peptide **21** (11.98 mg, 53%) as a white solid.



nm), and the product eluted at 19.5-21 min. The fractions were collected, and concentrated via lyophilization to afford hPTHrP(1-37) (1.86 mg, 47%) as a white solid.

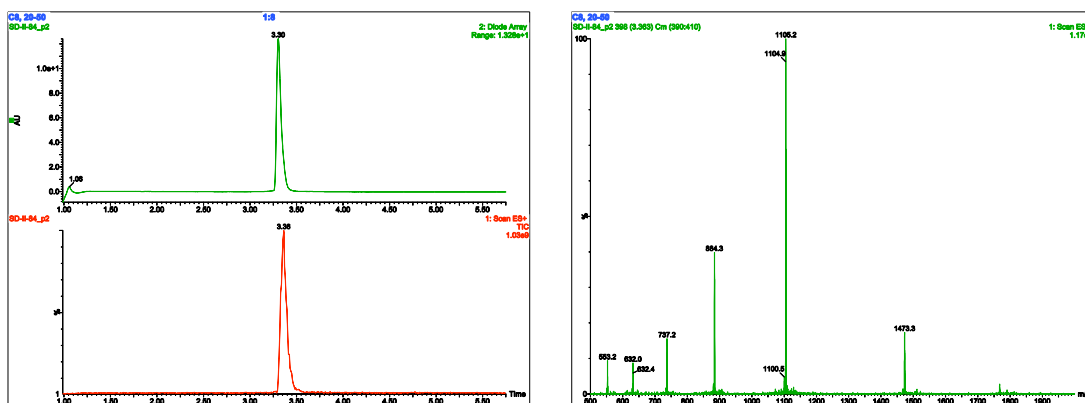

**Peptide 22:** Calcd for  $C_{197}H_{317}N_{63}O_{53}$ : 4416.02 Da (average isotopes),  $[M+3H]^{3+}$   $m/z = 1473.01$ ,  $[M+4H]^{4+}$   $m/z = 1105.01$ ,  $[M+5H]^{5+}$   $m/z = 884.20$ ,  $[M+6H]^{6+}$   $m/z = 737.00$ ,  $[M+7H]^{7+}$   $m/z = 631.86$ ,  $[M+8H]^{8+}$   $m/z = 553.00$ ; observed:  $[M+3H]^{3+}$   $m/z = 1473.3$ ,  $[M+4H]^{4+}$   $m/z = 1105.2$ ,  $[M+5H]^{5+}$   $m/z = 884.2$ ,  $[M+6H]^{6+}$   $m/z = 737.2$ ,  $[M+7H]^{7+}$   $m/z = 632.0$ ,  $[M+8H]^{8+}$   $m/z = 553.2$ .

(1) Haack, T.; Mutter, M. *Tetrahedron Lett.* **1992**, 33, 1589.

(2) Mergler, M.; Dick, F. *J. Peptide Sci.* **2005**, 11, 650-657.
